# Supplementary material for: Characterization of indigenous populations of cannabis in Iran: a morphological and phenological study
Source: BMC Plant Biol. 2024 Feb 29;24:151. doi: 10.1186/s12870-024-04841-y (PMC10902964; doi:10.1186/s12870-024-04841-y)
Supplement: Supplementary file 6 — Supplementary Material 6 [file 12870_2024_4841_MOESM6_ESM.docx]

| Nutrient | Vegetative stage | | | | Reproductive stage | | | |
| --- | --- | --- | --- | --- | --- | --- | --- | --- |
| Final nutrient concentration delivered (ppm) a | Fertilizer sources b  (ppm nutrient provided) | | | Final nutrient concentration delivered (ppm) a | Fertilizer sources b  (ppm nutrient provided) | | |
| Ammonium Phosphate ((NH4)3PO4) c | Calcium Nitrate  (Ca (NO3)2) d | Potassium Nitrate  (KNO3) e | Ammonium Phosphate ((NH4)3PO4) c | Calcium Nitrate  (Ca (NO3)2) d | Potassium Nitrate  (KNO3) e |
| N | 200 | 24 | 120 | 56 | 200 | 49 | 81 | 70 |
| P | 120 | 120 | - | - | 250 | 250 | - | - |
| K | 200 | - | - | 200 | 250 | - | - | 250 |
| Ca | 233 | - | 233 | - | 158 | - | 158 | - |
| Total | 753 | 144 (197) | 353 (889) | 256 (435) | 858 | 299 (409) | 239 (600) | 320 (543) |

**Table S4** Final nutrient concentrations and sources in different growth stages.

a 1 ppm = 1 mg/liter.

b Nutrient composition varies by source, affecting the amount needed for target concentrations.

c 12% Nitrogen (N) and 61% Phosphorus (P).

d 26.3% Calcium (Ca) and 13.5% N.

e 46% Potassium (K) and 13% N.

Note: Values in parentheses represent the actual amounts used, adjusted for purity.
